# Supplementary material
Source: MDPI journal article supplement (https://www.mdpi.com/1424-2818/11/3/39)
Supplement: s1 [file s1]

## Supplementary Information

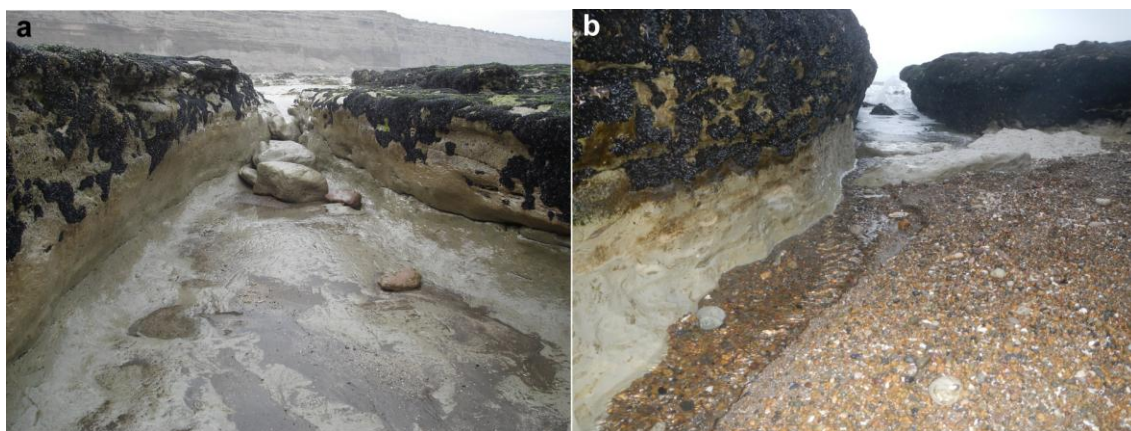

**Figure S1** (a) Barren rock surface in the lower platform, right under the seaward scarp. (b) Sand and gravel accumulation at the lower platform.

*Bagur et al. Diversity*

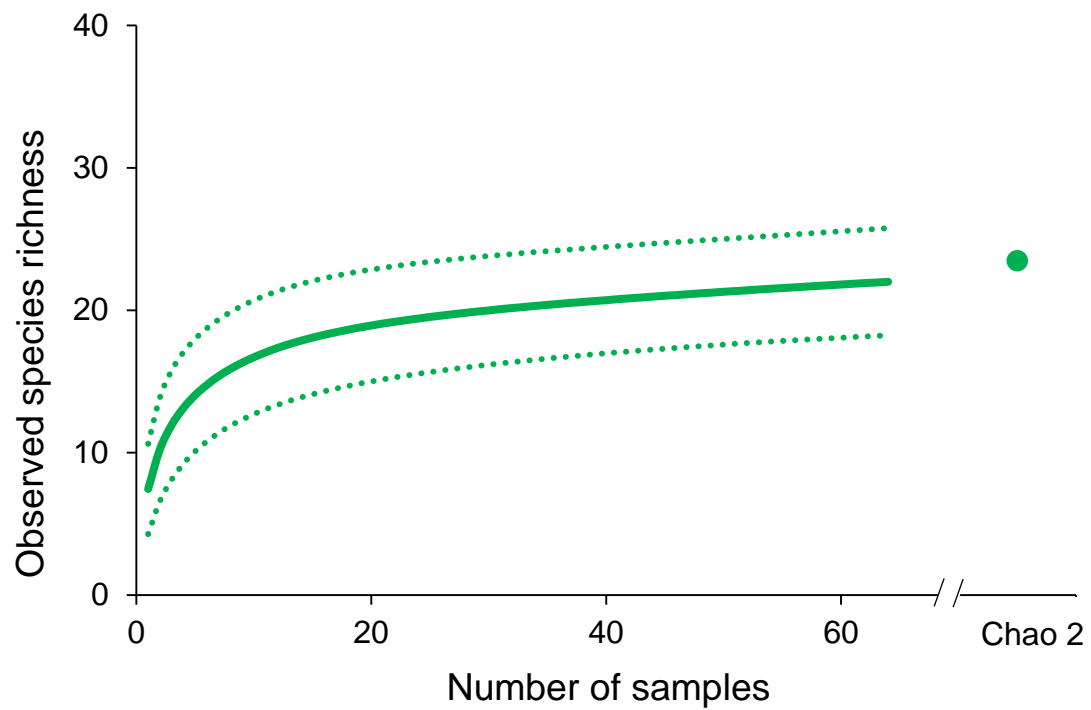

**Figure S2.** Species accumulation curve (continuous line) in mussel beds at the upper platform and 95 % upper and lower confidence intervals (dashed lines). The observed species richness ( $S_{obs}$ ) for 64 samples is shown together with the Chao 2 estimate of total species richness (green circle).
